# Supplementary material
Source: Research Square preprint supplement (doi:10.21203/rs.3.rs-10285909/v1)
Supplement: Supplementary file 1 [file 50b85d278f9b1538fa5a15fa.docx]

**Supporting Information**

**Prismatic rod-like structure CoP for efficient hydrogen evolution reaction**

Fan Yanga, Pengyu Zhan b, Zhanqing Liu a, Linlin Sun a, Yangyang Xub*

*a* *College of Chemistry and Materials Science,* *Weinan Normal University,* *Chaoyang Street, Shaanxi 714099, China*

*b Research Institute of Textile and Clothing Industries, Zhongyuan University of Technology, Zhengzhou, Henan Province 450007, China*

*Corresponding Author: [xi314209@126.com](mailto:xi314209@126.com)

**Figure S1** (a-c) SEM images and (d) EDS spectrum ofCoP/NF.

| **Element** | **Line Type** | **Weight %** | **Atomic %** |
| --- | --- | --- | --- |
| C | K series | 6.97 | 22.64 |
| O | K series | 5.18 | 12.71 |
| P | K series | 10.81 | 13.63 |
| Co | K series | 77.04 | 51.02 |
| Total |  | 100.00 | 100.00 |

**Table S1**. EDS quantitative results acquired from elemental mapping analysis. wt% and at% denote weight percentage and atomic percentage, respectively.

**Figure S2** Full spectrum of CoP/NF.

**Figure S3** The cyclic voltammetry curves of (a) Co-MOF/NF, (b) Co3O4/NF, and (c) CoP/NF in the non-Faradaic potential range.
